# Supplementary material
Source: MDPI journal article supplement (https://www.mdpi.com/2075-163X/12/6/677)
Supplement: s1 [file s1]

# Quantitative Study on Colour and Spectral Characteristics of Beihong Agate

Yufei Zhou, Ziyuan Liu, Zitong Zhao and Ying Guo \*

School of Gemmology, China University of Geosciences, Beijing 100083, China;  
2109190006@cugb.edu.cn (Y.Z.); lauzy@cugb.edu.cn (Z.L.); 2009190005@cugb.edu.cn (Z.Z.)

\* Correspondence: guoying@cugb.edu.cn

\* Correspondence: guoying@cugb.edu.cn

**Table S1.** The colour parameters of twenty-four samples.

|         | <i>L</i> <sup>*</sup> | <i>a</i> <sup>*</sup> | <i>b</i> <sup>*</sup> | <i>C</i> <sup>*</sup> | <i>h</i> <sup>°</sup> |
|---------|-----------------------|-----------------------|-----------------------|-----------------------|-----------------------|
| BH-F-1  | 63.78                 | 0.94                  | 12.25                 | 12.29                 | 85.61                 |
| BH-F-2  | 60.86                 | 2.57                  | 33.81                 | 33.91                 | 85.65                 |
| BH-F-3  | 54.54                 | 4.42                  | 35.21                 | 35.49                 | 82.84                 |
| BH-F-4  | 64.17                 | 3.77                  | 46.48                 | 46.63                 | 85.36                 |
| BH-F-5  | 54.37                 | 7.00                  | 37.13                 | 37.78                 | 79.32                 |
| BH-F-6  | 56.09                 | 10.76                 | 50.38                 | 51.52                 | 77.94                 |
| BH-F-7  | 52.94                 | 8.99                  | 45.51                 | 46.39                 | 78.83                 |
| BH-F-8  | 47.88                 | 17.54                 | 52.10                 | 54.97                 | 71.39                 |
| BH-F-9  | 54.57                 | 17.46                 | 55.94                 | 58.60                 | 72.67                 |
| BH-F-10 | 47.93                 | 21.17                 | 57.25                 | 61.04                 | 69.71                 |
| BH-F-11 | 40.19                 | 19.12                 | 39.36                 | 43.76                 | 64.09                 |
| BH-F-12 | 38.98                 | 19.83                 | 37.82                 | 42.70                 | 62.33                 |
| BH-F-13 | 42.45                 | 25.94                 | 48.17                 | 54.71                 | 61.70                 |
| BH-F-14 | 44.22                 | 15.77                 | 50.59                 | 52.99                 | 72.69                 |
| BH-F-15 | 39.43                 | 22.80                 | 44.67                 | 50.15                 | 62.96                 |
| BH-F-16 | 32.74                 | 23.42                 | 36.79                 | 43.61                 | 57.52                 |
| BH-F-17 | 35.05                 | 29.38                 | 48.82                 | 56.98                 | 58.96                 |
| BH-F-18 | 32.54                 | 32.48                 | 39.65                 | 51.25                 | 50.68                 |
| BH-F-19 | 36.93                 | 31.14                 | 47.83                 | 57.07                 | 56.93                 |
| BH-F-20 | 27.77                 | 29.54                 | 32.98                 | 44.28                 | 48.15                 |
| BH-F-21 | 28.20                 | 31.57                 | 31.52                 | 44.61                 | 44.95                 |
| BH-F-22 | 28.46                 | 30.34                 | 28.85                 | 41.87                 | 43.56                 |
| BH-F-23 | 25.92                 | 30.89                 | 32.72                 | 45.00                 | 46.65                 |
| BH-F-24 | 23.56                 | 29.73                 | 25.62                 | 39.25                 | 40.75                 |

**Table S2.** The results of XRF (wt %).

| Sample | SiO <sub>2</sub> | Fe <sub>2</sub> O <sub>3</sub> | Cr <sub>2</sub> O <sub>3</sub> | CuO   | K <sub>2</sub> O | V <sub>2</sub> O <sub>5</sub> | Sm <sub>2</sub> O <sub>3</sub> | Sum |
|--------|------------------|--------------------------------|--------------------------------|-------|------------------|-------------------------------|--------------------------------|-----|
| BH-F-1 | 99.898           | 0.035                          |                                | 0.007 |                  |                               | 0.059                          | 100 |
| BH-F-2 | 99.929           | 0.038                          | 0.024                          | 0.009 |                  |                               |                                | 100 |
| BH-F-3 | 99.881           | 0.041                          |                                | 0.012 | 0.056            | 0.009                         |                                | 100 |
| BH-F-4 | 99.943           | 0.035                          |                                | 0.012 |                  | 0.010                         |                                | 100 |
| BH-F-5 | 99.949           | 0.040                          |                                | 0.011 |                  |                               |                                | 100 |
| BH-F-6 | 99.939           | 0.052                          |                                | 0.009 |                  |                               |                                | 100 |
| BH-F-7 | 99.810           | 0.052                          |                                | 0.024 | 0.089            | 0.025                         |                                | 100 |
| BH-F-8 | 99.904           | 0.047                          |                                | 0.010 | 0.040            |                               |                                | 100 |

|         |        |       |       |       |       |       |     |
|---------|--------|-------|-------|-------|-------|-------|-----|
| BH-F-9  | 99.839 | 0.052 | 0.027 | 0.010 | 0.073 | 100   |     |
| BH-F-10 | 99.909 | 0.062 |       | 0.015 | 0.014 | 100   |     |
| BH-F-11 | 99.883 | 0.064 |       | 0.013 | 0.012 | 0.027 | 100 |
| BH-F-12 | 99.870 | 0.089 |       | 0.009 | 0.032 | 100   |     |
| BH-F-13 | 99.908 | 0.084 |       | 0.008 |       | 100   |     |
| BH-F-14 | 99.900 | 0.058 |       | 0.018 | 0.024 | 100   |     |
| BH-F-15 | 99.926 | 0.062 |       | 0.012 |       | 100   |     |
| BH-F-16 | 99.868 | 0.078 |       | 0.008 | 0.046 | 100   |     |
| BH-F-17 | 99.894 | 0.079 |       | 0.017 | 0.010 | 100   |     |
| BH-F-18 | 99.842 | 0.088 |       | 0.015 | 0.012 | 0.043 | 100 |
| BH-F-19 | 99.842 | 0.081 |       | 0.008 | 0.069 | 100   |     |
| BH-F-20 | 99.905 | 0.087 |       | 0.008 |       | 100   |     |
| BH-F-21 | 99.889 | 0.100 |       | 0.010 |       | 100   |     |
| BH-F-22 | 99.888 | 0.104 |       | 0.007 |       | 100   |     |
| BH-F-23 | 99.913 | 0.078 |       | 0.009 |       | 100   |     |
| BH-F-24 | 99.850 | 0.118 | 0.022 | 0.010 |       | 100   |     |

**Table S3.** Moganite content and Raman band integral ratio  $I_{(502)}/I_{(465)}$  in samples with different total Fe contents and hue angles.

| <b>Sample</b>  | <b><math>I_{(502)}/I_{(465)}</math></b> | <b>Moganite(wt.-%)</b> | <b><math>w(\text{Fe}_2\text{O}_3)\%</math></b> | <b><math>h^\circ</math></b> |
|----------------|-----------------------------------------|------------------------|------------------------------------------------|-----------------------------|
| <b>BH-F-1</b>  | 0.321                                   | 63.407                 | 0.035                                          | 85.612                      |
| <b>BH-F-2</b>  | 0.324                                   | 63.628                 | 0.038                                          | 85.653                      |
| <b>BH-F-4</b>  | 0.357                                   | 65.868                 | 0.035                                          | 85.363                      |
| <b>BH-F-6</b>  | 0.322                                   | 63.476                 | 0.052                                          | 77.944                      |
| <b>BH-F-8</b>  | 0.331                                   | 64.102                 | 0.047                                          | 71.394                      |
| <b>BH-F-10</b> | 0.316                                   | 63.040                 | 0.062                                          | 69.707                      |
| <b>BH-F-12</b> | 0.264                                   | 58.750                 | 0.089                                          | 62.331                      |
| <b>BH-F-14</b> | 0.314                                   | 62.896                 | 0.058                                          | 72.687                      |
| <b>BH-F-16</b> | 0.287                                   | 60.747                 | 0.078                                          | 57.520                      |
| <b>BH-F-18</b> | 0.275                                   | 59.744                 | 0.088                                          | 50.677                      |
| <b>BH-F-20</b> | 0.291                                   | 61.131                 | 0.087                                          | 48.149                      |
| <b>BH-F-22</b> | 0.274                                   | 59.715                 | 0.104                                          | 43.558                      |

**Table S4.** Relationships between the position of the primary trough within the range of 500-600 nm and the total Fe content and colour parameters.

| <b>sample</b>  | <b>The position of primary trough</b> | <b><math>L^*</math></b> | <b><math>C^*</math></b> | <b><math>h^\circ</math></b> | <b><math>w(\text{Fe}_2\text{O}_3)\%</math></b> |
|----------------|---------------------------------------|-------------------------|-------------------------|-----------------------------|------------------------------------------------|
| <b>BH-F-1</b>  |                                       | 63.78                   | 12.29                   | 85.61                       | 0.035                                          |
| <b>BH-F-2</b>  | 504                                   | 60.86                   | 33.91                   | 85.65                       | 0.038                                          |
| <b>BH-F-3</b>  | 502                                   | 54.54                   | 35.49                   | 82.84                       | 0.041                                          |
| <b>BH-F-4</b>  | 503                                   | 64.17                   | 46.63                   | 85.36                       | 0.035                                          |
| <b>BH-F-5</b>  | 514                                   | 54.37                   | 37.78                   | 79.32                       | 0.040                                          |
| <b>BH-F-6</b>  | 511                                   | 56.09                   | 51.52                   | 77.94                       | 0.052                                          |
| <b>BH-F-7</b>  | 511                                   | 52.94                   | 46.39                   | 78.83                       | 0.052                                          |
| <b>BH-F-8</b>  | 528                                   | 47.88                   | 54.97                   | 71.39                       | 0.047                                          |
| <b>BH-F-9</b>  | 522                                   | 54.57                   | 58.60                   | 72.67                       | 0.052                                          |
| <b>BH-F-10</b> | 533                                   | 47.93                   | 61.04                   | 69.71                       | 0.062                                          |
| <b>BH-F-11</b> | 532                                   | 40.19                   | 43.76                   | 64.09                       | 0.064                                          |
| <b>BH-F-12</b> | 540                                   | 38.98                   | 42.70                   | 62.33                       | 0.089                                          |
| <b>BH-F-13</b> | 540                                   | 42.45                   | 54.71                   | 61.70                       | 0.084                                          |

|                |     |       |       |       |       |
|----------------|-----|-------|-------|-------|-------|
| <b>BH-F-14</b> | 528 | 44.22 | 52.99 | 72.69 | 0.058 |
| <b>BH-F-15</b> | 538 | 39.43 | 50.15 | 62.96 | 0.062 |
| <b>BH-F-16</b> | 540 | 32.74 | 43.61 | 57.52 | 0.078 |
| <b>BH-F-17</b> | 548 | 35.05 | 56.98 | 58.96 | 0.079 |
| <b>BH-F-18</b> | 563 | 32.54 | 51.25 | 50.68 | 0.088 |
| <b>BH-F-19</b> | 575 | 36.93 | 57.07 | 56.93 | 0.081 |
| <b>BH-F-20</b> | 580 | 27.77 | 44.28 | 48.15 | 0.087 |
| <b>BH-F-21</b> | 579 | 28.20 | 44.61 | 44.95 | 0.100 |
| <b>BH-F-22</b> | 581 | 28.46 | 41.87 | 43.56 | 0.104 |
| <b>BH-F-23</b> | 582 | 25.92 | 45.00 | 46.65 | 0.078 |
| <b>BH-F-24</b> | 585 | 23.56 | 39.25 | 40.75 | 0.118 |

**Table S5.** Colour parameters and colour difference before and after teat treatment.

|                | 24°C  |       |       |       |           | 310°C |       |       |       |           | $\Delta E_{00}$ |
|----------------|-------|-------|-------|-------|-----------|-------|-------|-------|-------|-----------|-----------------|
|                | $L^*$ | $a^*$ | $b^*$ | $C^*$ | $h^\circ$ | $L^*$ | $a^*$ | $b^*$ | $C^*$ | $h^\circ$ |                 |
| <b>BH-F-1</b>  | 63.78 | 0.94  | 12.25 | 12.29 | 85.61     | 70.63 | 0.50  | 11.71 | 11.72 | 87.53     | 5.52            |
| <b>BH-F-2</b>  | 60.86 | 2.57  | 33.81 | 33.91 | 85.65     | 51.62 | 20.24 | 46.32 | 50.55 | 66.39     | 14.48           |
| <b>BH-F-3</b>  | 54.54 | 4.42  | 35.21 | 35.49 | 82.84     | 50.24 | 19.87 | 47.49 | 51.48 | 67.30     | 10.82           |
| <b>BH-F-4</b>  | 64.17 | 3.77  | 46.48 | 46.63 | 85.36     | 55.74 | 21.10 | 58.26 | 61.96 | 70.09     | 13.01           |
| <b>BH-F-5</b>  | 54.37 | 7.00  | 37.13 | 37.78 | 79.32     | 43.17 | 26.05 | 42.83 | 50.13 | 58.70     | 16.11           |
| <b>BH-F-6</b>  | 56.09 | 10.76 | 50.38 | 51.52 | 77.94     | 50.90 | 22.99 | 54.89 | 59.51 | 67.28     | 8.76            |
| <b>BH-F-7</b>  | 52.94 | 8.99  | 45.51 | 46.39 | 78.83     | 42.49 | 30.34 | 47.70 | 56.53 | 57.54     | 16.42           |
| <b>BH-F-8</b>  | 47.88 | 17.54 | 52.10 | 54.97 | 71.39     | 34.08 | 36.40 | 40.39 | 54.37 | 47.97     | 18.01           |
| <b>BH-F-9</b>  | 54.57 | 17.46 | 55.94 | 58.60 | 72.67     | 37.51 | 35.91 | 45.54 | 58.00 | 51.74     | 20.66           |
| <b>BH-F-10</b> | 47.93 | 21.17 | 57.25 | 61.04 | 69.71     | 32.23 | 38.28 | 39.21 | 54.79 | 45.69     | 19.49           |
| <b>BH-F-11</b> | 40.19 | 19.12 | 39.36 | 43.76 | 64.09     | 22.34 | 25.97 | 20.18 | 32.88 | 37.85     | 18.17           |
| <b>BH-F-12</b> | 38.98 | 19.83 | 37.82 | 42.70 | 62.33     | 17.83 | 14.58 | 9.41  | 17.35 | 32.85     | 21.41           |
| <b>BH-F-13</b> | 42.45 | 25.94 | 48.17 | 54.71 | 61.70     | 21.39 | 28.20 | 21.83 | 35.66 | 37.74     | 20.78           |
| <b>BH-F-14</b> | 44.22 | 15.77 | 50.59 | 52.99 | 72.69     | 40.89 | 38.67 | 54.20 | 66.58 | 54.49     | 12.15           |
| <b>BH-F-15</b> | 39.43 | 22.80 | 44.67 | 50.15 | 62.96     | 22.21 | 27.47 | 22.99 | 35.82 | 39.93     | 17.59           |
| <b>BH-F-16</b> | 32.74 | 23.42 | 36.79 | 43.61 | 57.52     | 20.10 | 20.50 | 10.64 | 23.10 | 27.43     | 16.15           |
| <b>BH-F-17</b> | 35.05 | 29.38 | 48.82 | 56.98 | 58.96     | 19.64 | 29.18 | 24.53 | 38.12 | 40.05     | 15.68           |
| <b>BH-F-18</b> | 32.54 | 32.48 | 39.65 | 51.25 | 50.68     | 17.91 | 29.88 | 19.63 | 35.75 | 33.30     | 13.96           |
| <b>BH-F-19</b> | 36.93 | 31.14 | 47.83 | 57.07 | 56.93     | 22.08 | 32.70 | 24.09 | 40.62 | 36.39     | 15.70           |
| <b>BH-F-20</b> | 27.77 | 29.54 | 32.98 | 44.28 | 48.15     | 18.19 | 31.40 | 18.84 | 36.62 | 30.97     | 10.07           |
| <b>BH-F-21</b> | 28.20 | 31.57 | 31.52 | 44.61 | 44.95     | 14.00 | 23.12 | 14.10 | 27.09 | 31.38     | 12.95           |
| <b>BH-F-22</b> | 28.46 | 30.34 | 28.85 | 41.87 | 43.56     | 16.70 | 30.77 | 18.51 | 35.91 | 31.04     | 9.91            |
| <b>BH-F-23</b> | 25.92 | 30.89 | 32.72 | 45.00 | 46.65     | 12.12 | 21.80 | 12.85 | 25.30 | 30.52     | 13.40           |
| <b>BH-F-24</b> | 23.56 | 29.73 | 25.62 | 39.25 | 40.75     | 10.89 | 17.47 | 9.58  | 19.93 | 28.73     | 12.46           |
